# Supplementary material for: Identification of Gene-Expression Signatures and Protein Markers for Breast Cancer Grading and Staging
Source: PubMed Central journal article supplement (PMC4573873; doi:10.1371/journal.pone.0138213), 2015-09-16

**CDC45 RSEM**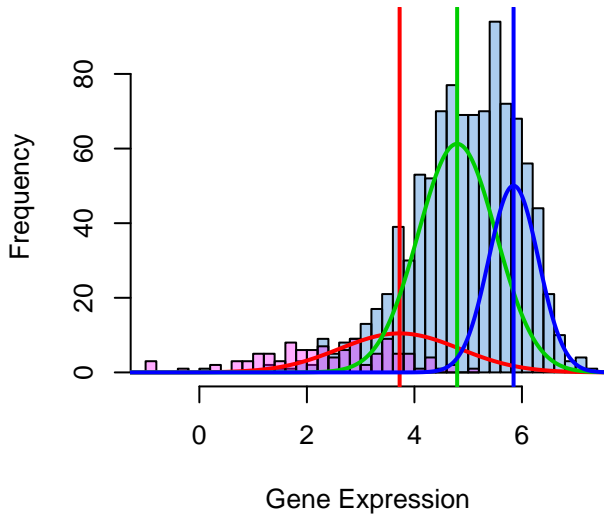**DNALI1 RSEM**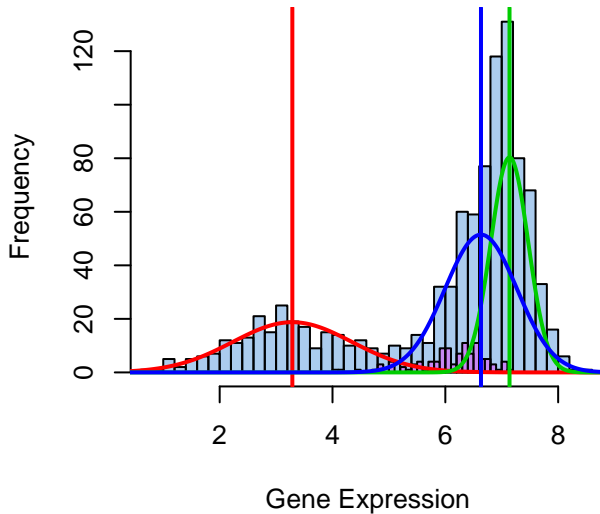**PREX1 RSEM**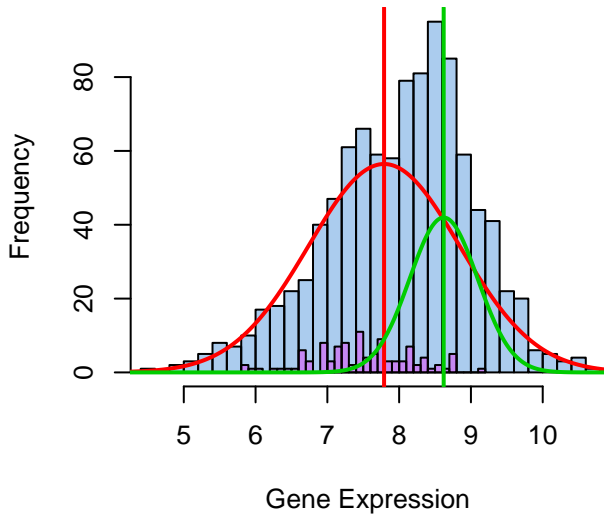**ESR1 RSEM**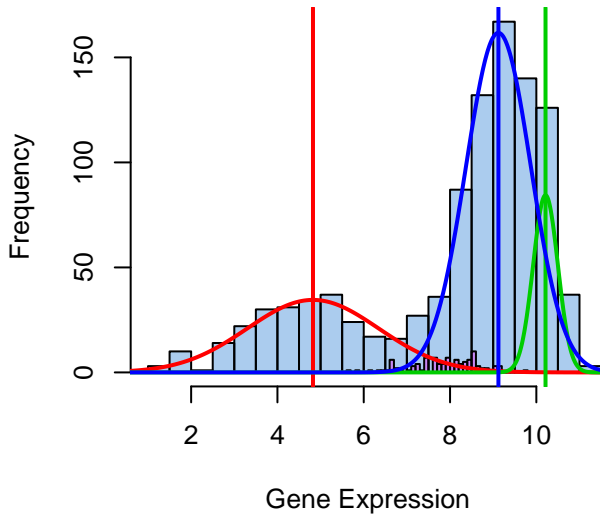

Supplement: pone.0138213.s011.pdf [file pone.0138213.s011.pdf]
