# Supplementary material for: Identification of Gene-Expression Signatures and Protein Markers for Breast Cancer Grading and Staging
Source: PLoS One. 2015 Sep 16;10(9):e0138213. doi: 10.1371/journal.pone.0138213 (PMC4573873; doi:10.1371/journal.pone.0138213)
Supplement: S1 Table — (XLSX) [file pone.0138213.s001.xlsx]

## Sheet: Sheet1
# top k- gene combination(k=1,2,…,20) which can distinguish breast cancer from all other cancers; and breast cancer from control samples with following accuracy.
Gene_name	acc_brca_ctrl	mean_acc_brca_other cancer	acc_brca_blca	acc_brca_coad	acc_brca_hnsc	acc_brca_kich	acc_brca_kirc	acc_brca_kirp	acc_brca_lihc	acc_brca_luad	acc_brca_lusc	acc_brca_prad	acc_brca_read	acc_brca_thca
COPA	90.0623	80.7326	85.4063	86.6562	76.3803	89.8889	84.7949	81.6554	68.0815	63.0635	73.274	75.0924	91.7333	92.7641
GATA3	96.2826	84.3696	87.7109	91.4046	77.7056	94.1686	95.083	88.7935	68.0438	62.6651	78.4641	82.6444	91.7333	94.0186
HDGF	97.5632	86.8515	87.7109	90.3843	82.2908	97.8135	95.8961	92.6582	83.2198	62.8579	77.1634	86.3983	91.7333	94.0911
LUM	99.0504	88.4681	89.326	89.9105	80.3155	97.4802	96.2848	94.4765	91.2057	66.073	79.9339	92.2254	90.8233	93.5627
SPINT2	98.7144	89.6992	88.9795	93.5314	81.133	98.4725	96.8117	95.2793	90.3824	69.2849	80.2557	92.318	93.675	96.267
STAT1	98.7806	89.9347	88.4851	93.9081	80.3802	98.3665	96.7578	94.1372	89.7043	71.3302	82.5444	93.1349	94.2983	96.1697
AEBP1	98.5316	89.7002	87.7402	94.554	79.9649	97.5594	97.2274	94.4842	88.7016	70.9905	80.8645	94.2879	93.3467	96.681
CALR	99.0514	89.5893	88.2489	93.4077	79.5088	96.9796	96.913	94.6522	89.3456	69.3746	79.7714	94.8999	93.4283	98.5421
TRPS1	99.7273	89.1759	88.5856	92.6109	79.7397	96.2069	96.361	93.897	88.9698	68.719	79.4229	94.3825	92.81	98.4055
EPRS	99.5711	89.1185	88.7736	92.727	80.3198	96.212	96.3347	93.2486	89.0856	68.4603	79.4844	93.5041	93.145	98.1271
ARL6IP1	99.9328	90.9226	88.0114	96.0863	81.9954	96.8736	97.1991	94.2997	94.1847	72.8087	82.3679	94.0517	94.7133	98.4792
EVL	99.9338	92.02	88.7777	95.638	85.9956	97.1622	97.0958	94.3286	94.3107	79.9349	82.0556	94.4826	95.9467	98.5114
RAD21	99.9783	92.6105	88.1263	95.4198	85.4784	96.7969	97.0972	93.8258	93.4754	84.454	87.4287	95.3417	95.5767	98.3056
PKM2	99.7747	92.618	87.833	94.5861	86.0872	96.6884	97.1235	94.4131	94.5599	84.0278	87.3691	95.1249	95.365	98.2378
CD9	99.7747	93.6091	88.8527	94.1661	86.5443	96.4662	97.3853	96.139	94.3393	92.5302	86.8343	96.7392	95.075	98.2378
NPNT	99.8864	93.9912	90.4369	93.313	85.5644	96.5773	97.1498	95.4928	93.9119	94.4889	92.3695	96.2836	95.0733	97.2334
CLTC	99.9773	94.2466	90.0093	93.7997	86.6033	96.4266	97.4103	95.2535	95.5128	94.8857	93.0019	95.919	94.91	97.2274
CDH1	99.9773	93.458	88.6711	92.7053	86.0942	95.8365	96.6802	94.377	94.989	93.8667	92.5769	95.2832	94.12	96.2957
NAT1	99.9773	93.1341	88.6586	92.5281	86.2233	95.143	96.6802	93.9502	94.1896	93.3516	92.1693	94.8845	93.2533	96.5777
SH3BGRL	99.9773	94.2959	92.4707	94.3117	87.4253	95.8736	96.8097	94.7154	95.9145	92.4722	92.7338	95.5533	96.9017	96.3686
note:	acc_brca_ctrl denotes classification accuracy between breast cancer and control samples;
	mean_acc_brca_other cancer denotes classification accuracy between breast cancer and all other cancers;
	acc_brca_blca denotes classification accuracy between breast cancer and Bladder Urothelial Carcinoma;
	acc_brca_coad denotes classification accuracy between breast cancer and Colon adenocarcinoma;
	acc_brca_hnsc denotes classification accuracy between breast cancer and Head and Neck squamous cell carcinoma;
	acc_brca_kich denotes classification accuracy between breast cancer and Kidney Chromophobe;
	acc_brca_kirc denotes classification accuracy between breast cancer and Kidney renal clear cell carcinoma;
	acc_brca_kirp denotes classification accuracy between breast cancer and Kidney renal papillary cell carcinoma;
	acc_brca_lihc denotes classification accuracy between breast cancer and Liver hepatocellular carcinoma;
	acc_brca_luad denotes classification accuracy between breast cancer and Lung adenocarcinoma;
	acc_brca_lusc denotes classification accuracy between breast cancer and Lung squamous cell carcinoma;
	acc_brca_prad denotes classification accuracy between breast cancer and Prostate adenocarcinoma;
	acc_brca_read denotes classification accuracy between breast cancer and Rectum adenocarcinoma;
	acc_brca_thca denotes classification accuracy between breast cancer and Thyroid carcinoma.
