# Supplementary material for: Identification of Gene-Expression Signatures and Protein Markers for Breast Cancer Grading and Staging
Source: PLoS One. 2015 Sep 16;10(9):e0138213. doi: 10.1371/journal.pone.0138213 (PMC4573873; doi:10.1371/journal.pone.0138213)
Supplement: S6 Table — (XLSX) [file pone.0138213.s006.xlsx]

## Sheet: 36-gene protein in blood
# 36-gene combination , whose protein concentration level may be the most distinguishing between breast and other cancers in blood.
Gene Name	Accession	Protein Name	Ratio	Q Value
MAPKAPK2	P49137	MAP kinase-activated protein kinase 2	1.24593	1.53874e-17
PARP1	P09874	Poly [ADP-ribose] polymerase 1	1.3196	9.48101e-19
CCT3	P49368	T-complex protein 1 subunit gamma	1.23855	9.0836e-19
VAV3	Q9UKW4	Guanine nucleotide exchange factor VAV3	9.34292	2.8445e-14
AEBP1	Q8IUX7	Adipocyte enhancer-binding protein 1	2.24161	7.27272e-11
KDM5B	Q9UGL1	Lysine-specific demethylase 5B	1.29679	3.8942e-18
NPNT	Q6UXI9	Nephronectin	4.78152	6.09338e-16
TMED3	Q9Y3Q3	Transmembrane emp24 domain-containing protein 3	2.68439	4.23271e-18
NEBL	O76041	Nebulette	2.38414	0.000622535
STAT1	P42224	Signal transducer and activator of transcription 1-alpha/beta	1.48779	2.53817e-16
POGK	Q9P215	Pogo transposable element with KRAB domain	1.02514	5.09918e-18
ATP2A3	Q93084	Sarcoplasmic/endoplasmic reticulum calcium ATPase 3	2.21874	1.64108e-12
FKBP4	Q02790	Peptidyl-prolyl cis-trans isomerase FKBP4	2.26553	1.77232e-17
ABHD2	P08910	Abhydrolase domain-containing protein 2	1.16113	1.28145e-11
EFNA1	P20827	Ephrin-A1	1.33522	2.23617e-13
PRSS8	Q16651	Prostasin	308.739	2.73125e-15
CALR	P27797	Calreticulin	1.04863	5.30706e-18
LUM	P51884	Lumican	1.47921	1.41169e-08
MAZ	P56270	Myc-associated zinc finger protein	1.45882	1.79342e-18
PDXDC1	Q6P996	Pyridoxal-dependent decarboxylase domain-containing protein 1	1.08799	2.15219e-18
SPINT1	O43278	Kunitz-type protease inhibitor 1	24.1089	1.08448e-12
REPS2	Q8NFH8	RalBP1-associated Eps domain-containing protein 2	2.78375	4.99094e-09
CREB3L4	Q8TEY5	Cyclic AMP-responsive element-binding protein 3-like protein 4	3.78537	2.05018e-16
PGK1	P00558	Phosphoglycerate kinase 1	1.00082	7.84706e-17
KIAA1522	Q9P206	Uncharacterized protein KIAA1522	1.72773	1.06147e-08
SIPA1L3	O60292	Signal-induced proliferation-associated 1-like protein 3	1.88525	5.47614e-16
GBP5	Q96PP8	Guanylate-binding protein 5	4.90565	1.09731e-13
TTLL12	Q14166	Tubulin--tyrosine ligase-like protein 12	1.71653	5.36146e-16
ZNF217	O75362	Zinc finger protein 217	1.06025	9.68783e-12
ARNT2	Q9HBZ2	Aryl hydrocarbon receptor nuclear translocator 2	7.14869	6.63725e-14
FOXRED2	Q8IWF2	FAD-dependent oxidoreductase domain-containing protein 2	1.03315	5.18992e-17
ALDH18A1	P54886	Delta-1-pyrroline-5-carboxylate synthase	1.1687	1.06419e-18
RSAD2	Q8WXG1	Radical S-adenosyl methionine domain-containing protein 2	3.02553	5.8759e-13
TGFB3	P10600	Transforming growth factor beta-3	1.07488	7.68578e-11
PCK2	Q16822	Phosphoenolpyruvate carboxykinase [GTP], mitochondrial	1.06062	4.14957e-07
SERPINA3	P01011	Alpha-1-antichymotrypsin	9.9198	3.34991e-06

## Sheet: 15-gene proteins in urine
# 15-gene combination , whose protein concentration level may be the most distinguishing between breast and other cancers in urine.
Gene Name	Accession	Protein Name	Ratio	Q Value
B4GALT3	O60512	Beta-1,4-GalTase 3	1.34389	1.73936e-18
RAB31	Q13636	Ras-related protein Rab-31	2.89025	2.83268e-17
EFNA1	P20827	Ephrin-A1	1.33522	2.23617e-13
NPNT	Q6UXI9	Nephronectin	4.78152	6.09338e-16
SEMA4A	Q9H3S1	Semaphorin-4A	2.51382	6.82118e-07
H2AFZ	P0C0S5	Histone H2A.Z	1.53872	9.11152e-19
SMARCA4	P51532	Transcription activator BRG1	1.08218	2.89867e-17
H2AFY	O75367	Core histone macro-H2A.1	1.1485	9.0836e-19
NSF	P46459	Vesicle-fusing ATPase	1.02129	1.53874e-17
HIST1H2AC	Q93077	Histone H2A type 1-C	2.31871	1.71487e-14
CDH1	P12830	Cadherin-1	200.943	9.33488e-07
H3F3A	P84243	Histone H3.3	1.224	1.59592e-17
CLTC	Q00610	Clathrin heavy chain 1	1.36326	1.41482e-17
EZR	P15311	Ezrin	2.06448	1.19616e-17
HLA-DQA2	P01906	HLA class II histocompatibility antigen, DQ alpha 2 chain	1.08391	2.12748e-10
