# Supplementary material for: Identification of Gene-Expression Signatures and Protein Markers for Breast Cancer Grading and Staging
Source: PLoS One. 2015 Sep 16;10(9):e0138213. doi: 10.1371/journal.pone.0138213 (PMC4573873; doi:10.1371/journal.pone.0138213)
Supplement: S10 Table — (XLSX) [file pone.0138213.s010.xlsx]

## Sheet: svm result
# TCGA microarray data
	K-gene	Accuracy	Sensitivity	Specificity
G3 vs.G1G2	9-gene	0.8708	0.7983	0.8963
G2 vs. G1	16-gene	0.8313	0.9183	0.5
T34 vs.T1T2	21-gene	0.7638	0.48	0.8595
T2 vs. T1	18-gene	0.802	0.8933	0.54
# GEO microarray data
Datasets	G3 vs.G1G2				G2 vs. G1
	K-gene	Accuracy	Sensitivity	Specificity	K-gene	Accuracy	Sensitivity	Specificity
GSE21653	9-gene	0.7539	0.758	0.7502	18-gene	0.7272	0.8373	0.51
GSE5460	9-gene	0.7769	0.7836	0.7683	18-gene	0.7436	0.7367	0.7502
GSE61304	9-gene	0.7805	0.8593	0.6425	18-gene	0.681	0.7575	0.44
Datasets	T34 vs.T1T2				T2 vs. T1
	K-gene	Accuracy	Sensitivity	Specificity	K-gene	Accuracy	Sensitivity	Specificity
GSE37946	16-gene	0.5071	0.6117	0.3442	**	**	**	**
GSE46581	18-gene	0.7692	0.1258	0.9201	14-gene	0.611	0.7542	0.366
GSE61304	26-gene	0.5038	0.2442	0.6296	19-gene	0.7809	0.8802	0.11

## Sheet: svmrfe result
# TCGA microarray data
	K-gene	Accuracy	Sensitivity	Specificity
G3 vs.G1G2	9-gene	0.9969	1	0.9959
G2 vs. G1	14-gene	0.9988	0.9983	1
T34 vs.T1T2	14-gene	0.9891	0.9767	0.9938
T2 vs. T1	12-gene	0.9836	0.9983	0.94
# GEO microarray data
	G3 vs.G1G2				G2 vs. G1
	K-gene	Accuracy	Sensitivity	Specificity	K-gene	Accuracy	Sensitivity	Specificity
GSE21653	38-gene	0.9182	0.9008	0.9343	31-gene	0.9523	0.9628	0.9311
GSE5460	27-gene	0.9492	0.9507	0.9475	17-gene	0.9429	0.9371	0.9497
GSE61304	23-gene	0.9913	0.9946	0.9855	10-gene	0.9955	1	0.98
	T34 vs.T1T2				T2 vs. T1
	K-gene	Accuracy	Sensitivity	Specificity	K-gene	Accuracy	Sensitivity	Specificity
GSE37946	34-gene	0.9627	0.9567	0.9725	**	**	**	**
GSE46581	36-gene	0.9327	0.8033	0.9638	29-gene	0.958	0.9686	0.94
GSE61304	38-gene	0.9908	0.98	0.9963	8-gene	0.995	0.9986	0.97
